# Supplementary material for: Alteration of microbiota antibody‐mediated immune selection contributes to dysbiosis in inflammatory bowel diseases
Source: EMBO Mol Med. 2022 Jul 4;14(8):e15386. doi: 10.15252/emmm.202115386 (PMC9358401; doi:10.15252/emmm.202115386)
Supplement: Supplementary file 1 — Appendix [file EMMM-14-e15386-s001.pdf]

## APPENDIX

### Table of Content

|                                                                                                                          |    |
|--------------------------------------------------------------------------------------------------------------------------|----|
| <i>Appendix Figure S1. Gating strategy for IgA-bound microbiota by flow cytometry.</i>                                   | 2  |
| <i>Appendix Figure S2.</i>                                                                                               | 3  |
| <i>Appendix Figure S3.</i>                                                                                               | 4  |
| <i>Appendix Figure S4.</i>                                                                                               | 5  |
| <i>Appendix Table S1. Clinical characteristics of subjects in the cohort.</i>                                            | 7  |
| <i>Appendix Table S2.</i>                                                                                                | 8  |
| <i>Appendix Table S3. Correlation between percent IgA1 or IgA2 reverse transcytosis and Dectin-1 binding</i>             | 8  |
| <i>Appendix Table S4. Primary sequences of IgA1/IgA2 heavy chain peptides potentially N/O-glycosylated.</i>              | 9  |
| <i>Appendix Table S5. IgA1 heavy chain N-glycopeptides identified in CD samples.</i>                                     | 9  |
| <i>Appendix Table S6 - IgA2 heavy chain N-glycopeptides identified in CD and UC samples.</i>                             | 10 |
| <i>Appendix Table S7. IgA1 heavy chain O-glycoforms identified in CD and UC samples.</i>                                 | 11 |
| <i>Appendix Table S8. Glycan motifs recognition by CD IgAs</i>                                                           | 12 |
| <i>Appendix Table S11. Glycan motifs in IgA1-targeted clusters</i>                                                       | 16 |
| <i>Appendix Table S12. Glycan motifs in IgA2-targeted clusters</i>                                                       | 18 |
| <i>Appendix Table S13. Differentially recognised species in the IgA1<sup>+</sup> fraction of the CD stool microbiota</i> | 19 |
| <i>Appendix Table S14. FISH probe sequences (Eurogentec)</i>                                                             | 19 |

## Appendix Figures

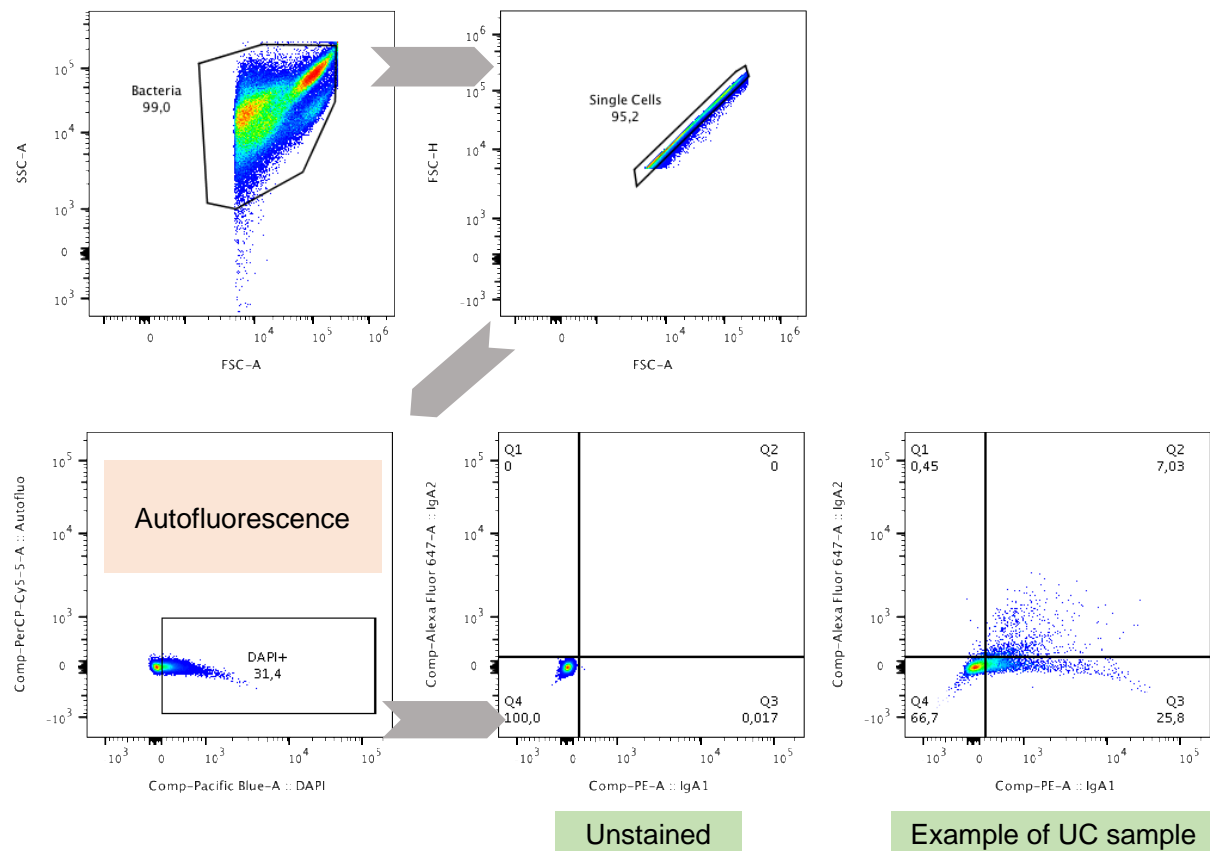

**Appendix Figure S1. Gating strategy for IgA-bound microbiota by flow cytometry.**

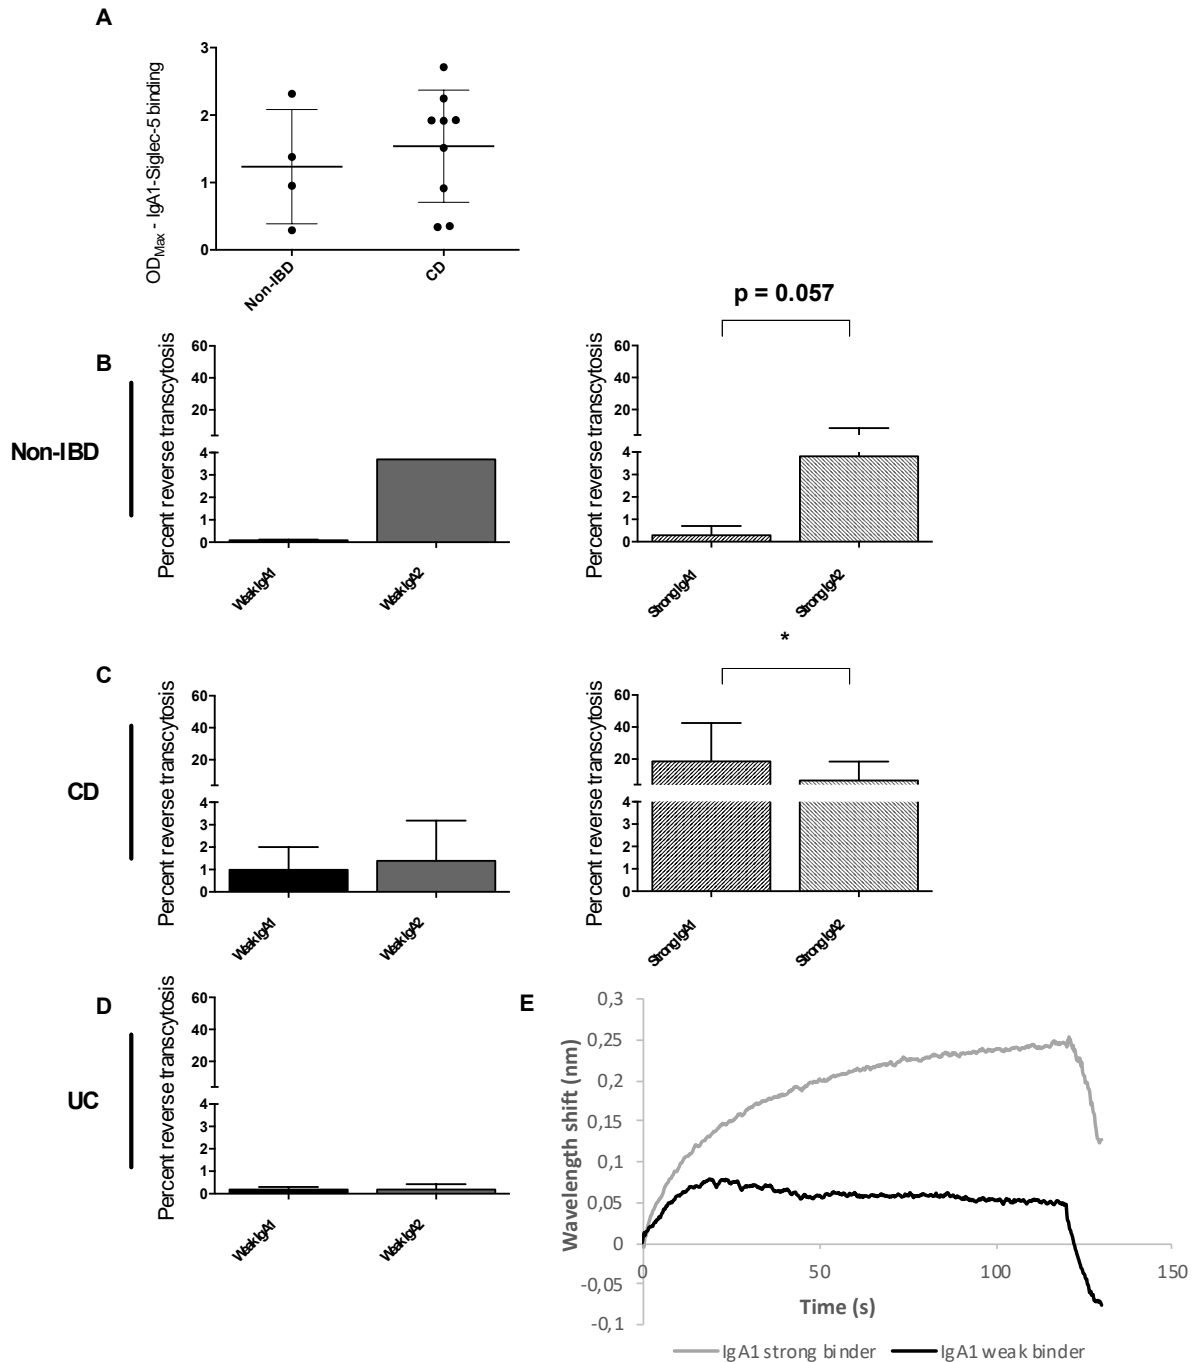

**Appendix Figure S2.**

(A) ELISA assay of IgA1-Siglec-5 binding, at a rate of one receptor per 10 IgA. (B-D) ELISA assay of IgA1-Dectin-1 binding, at a rate of one receptor per 10 IgA compared to the percent reverse-transcytosis on an inverted model of FAE from Caco2 and Raji cells co-culture of purified IgA with either weak or strong Dectin-1 binding in non-IBD patients (B), CD (C) or UC (D) patients. Data were analyzed using the Kruskal-Wallis test when possible, or the Mann-Whitney test. \*: p-value < 0,05. Non-IBD : n= 6; CD : n= 8 ; UC : n=5. (E) Representative association and dissociation curves of IgA&-Dectin-1 complexes for CD weak (black line) and strong binders (grey line) by biolayer interferometry.

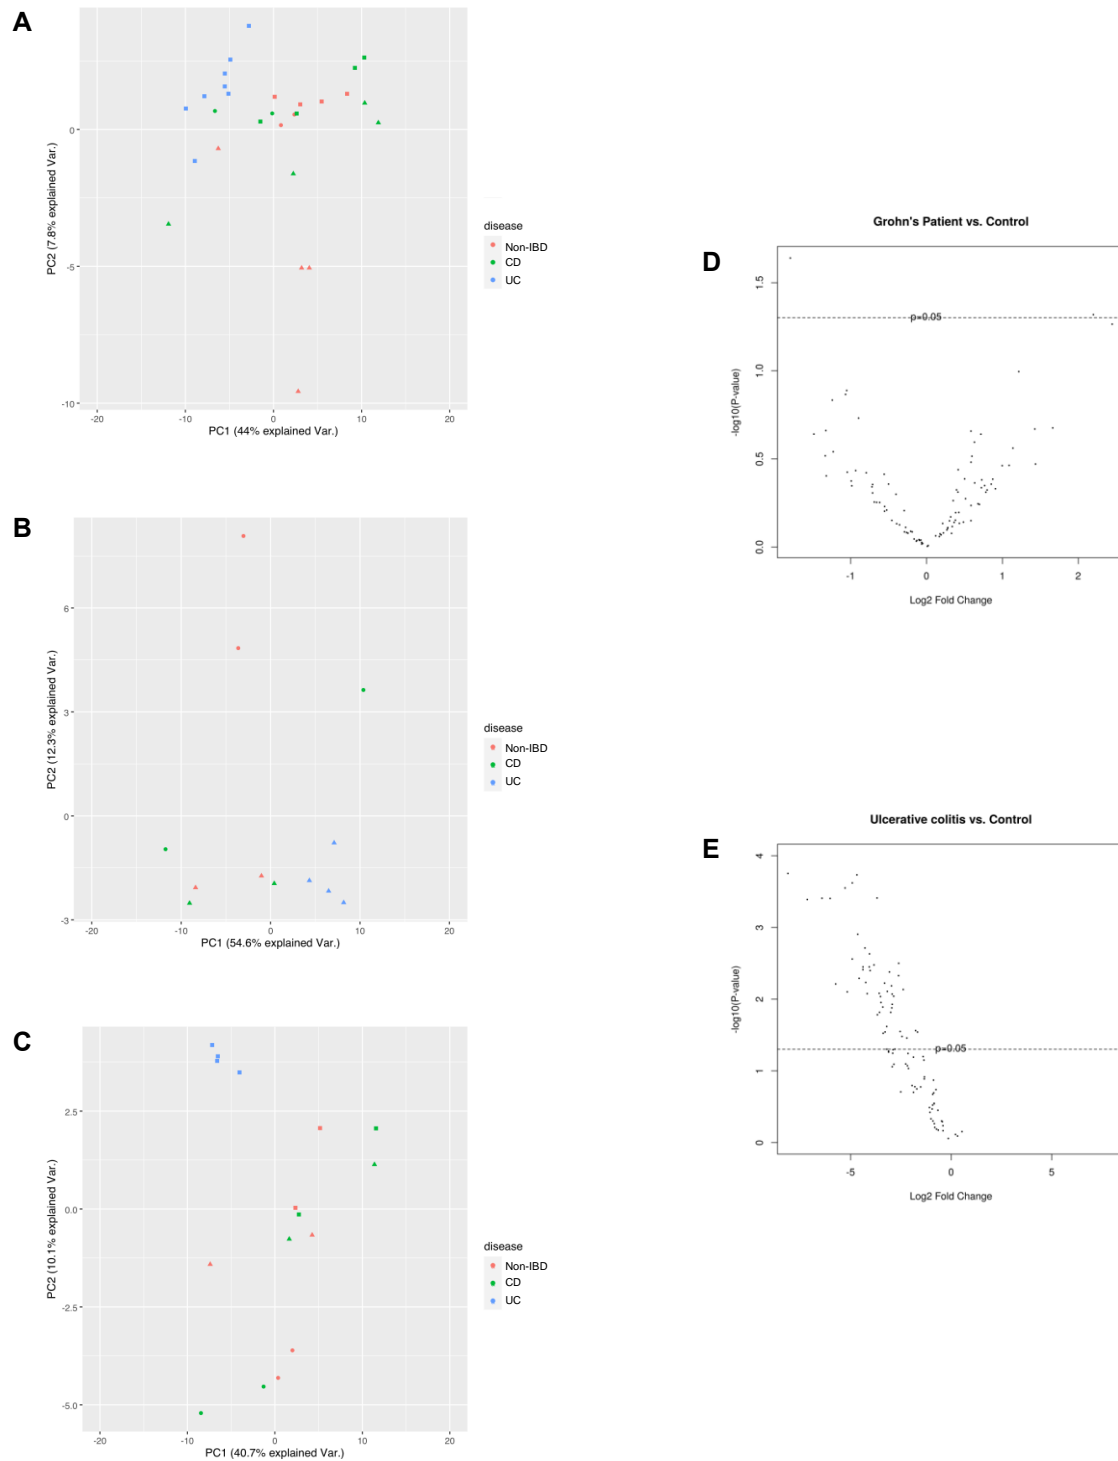

### Appendix Figure S3.

Principal component analysis (PCA) plot of 100 glycan targets of purified IgA1 and IgA2 combined (A), IgA1 only (B) or IgA2 only (C) in non-IBD, CD and UC groups. (D) Plotted distributions of CD versus non-IBD IgA1 and IgA2 glycan targets after log2 data transformation using non-IBD datasets as controls. (E) Plotted distributions of UC versus non-IBD IgA1 and IgA2 glycan targets after log2 data transformation using non-IBD datasets as controls. For IgA1, Non-IBD : n= 4; CD : n= 4; UC : n= 4. For IgA2, Non-IBD : n= 6; CD : n= 6; UC : n= 6. Data were analyzed using the limma package in R and the dotted line indicates significance thresholds.

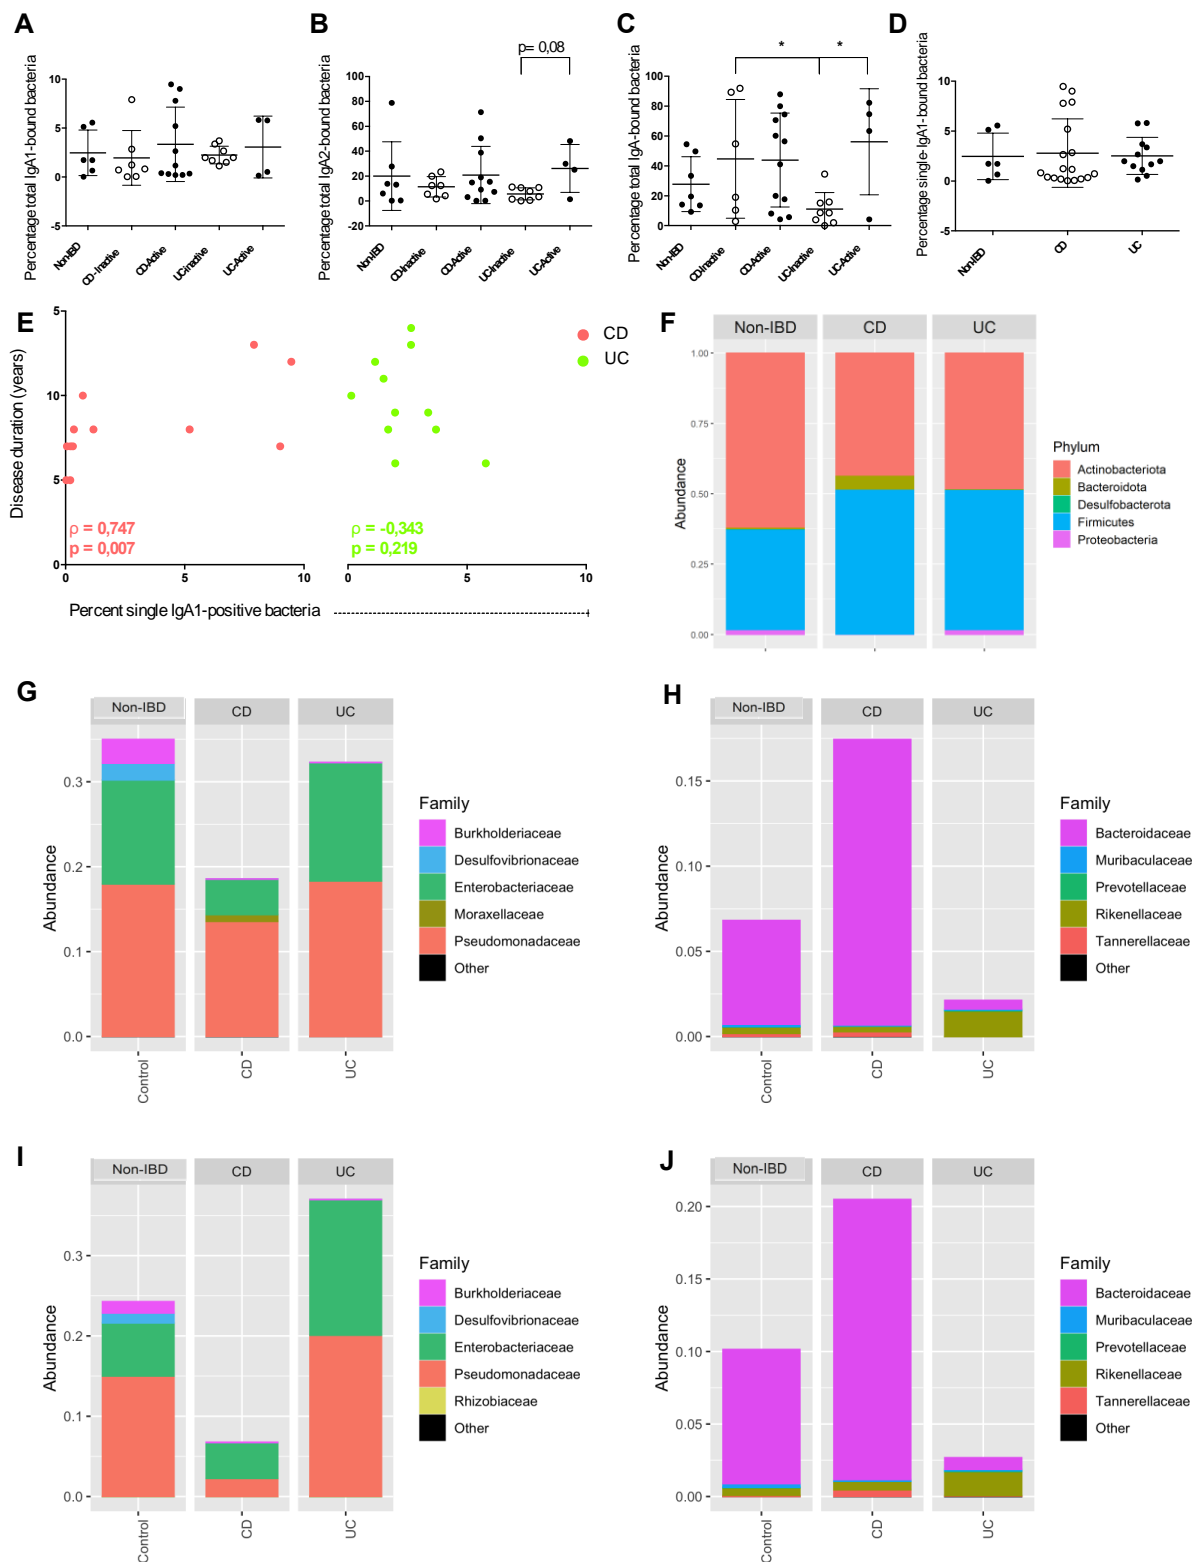

**Appendix Figure S4.**

(A-C) Flow cytometry analysis of IgA-bound bacteria according to disease status at the time of collection; (A) Total IgA1<sup>+</sup> IgA2<sup>-</sup> bacteria, (B) Total IgA1<sup>-</sup> IgA2<sup>+</sup> bacteria, (C) Total IgA1<sup>+</sup> IgA2<sup>+</sup> bacteria. (D) Total single-IgA1-positive bacteria frequency. Data were analysed with a Kruskal-Wallis

multiple comparison test. \*: p-value < 0,05. **(E)** Plotted data for correlation between disease duration and IgA<sup>+</sup> IgA2<sup>-</sup> bacteria counts analyzed by Spearman's correlation test in CD and UC **(F)** Phylum-level composition of fecal microbiota in non-IBD, CD and UC. **(G)** Family-level composition of IgA1-bound *Proteobacteria* in non-IBD, CD and UC. **(H)** Family-level composition of IgA1-bound *Bacteroidetes* in non-IBD, CD and UC. **(I)** Family-level composition of IgA2-bound *Proteobacteria* in non-IBD, CD and UC. **(J)** Family-level composition of IgA2-bound *Bacteroidetes* in non-IBD, CD and UC.

|                                          | <b>Non-IBD</b>  | <b>CD</b>           | <b>UC</b>       |
|------------------------------------------|-----------------|---------------------|-----------------|
| <b>Male/Female (%)</b>                   | 37 (3) / 63 (5) | 47,1 (8) / 52,9 (9) | 50 (6) / 50 (6) |
| <b>Age (yr, mean ± SD)</b>               | 41,4 (±24,3)    | 43,9 (±18,4)        | 53,8 (±19,7)    |
| <b>Age at diagnostic (yr, mean ± SD)</b> | -               | 32,5 (±16,9)        | 48,7 (±15,9)    |
| <b>Duration (yr, mean ± SD)</b>          | -               | 8,2 (±3,1)          | 8,7 (±2,8)      |
| <b>Phenotype (%)</b>                     | -               |                     |                 |
| <i><b>CD</b></i>                         | -               |                     | -               |
| L1                                       |                 | 47,1 (8)            |                 |
| L2                                       |                 | 29,4 (5)            |                 |
| L3                                       |                 | 23,5 (4)            |                 |
| <i><b>Behavior</b></i>                   | -               |                     |                 |
| B1                                       |                 | 76,5 (13)           |                 |
| B2                                       |                 | 17,6 (3)            |                 |
| B3                                       |                 | 5,88 (1)            |                 |
| <i><b>UC</b></i>                         | -               | -                   |                 |
| E1                                       |                 | -                   | 25 (3)          |
| E2                                       |                 | -                   | 25 (3)          |
| E3                                       |                 | -                   | 50 (6)          |
| <b>Operations (%)</b>                    | -               | 11,8 (2)            | 0               |
| <b>Disease status (%)</b>                | -               |                     |                 |
| Active                                   |                 | 70,6 (12)           | 33,3 (4)        |
| Remission                                |                 | 29,4 (5)            | 66,7 (8)        |
| <b>Smoking habits (%)</b>                | -               |                     |                 |
| Yes                                      |                 | 64,7 (11)           | unknown         |
| No                                       |                 | 35,3 (6)            | unknown         |
| <b>Medication (%)</b>                    | -               |                     |                 |
| Anti-TNF                                 |                 | 100 (17)            | 100 (12)        |

**Appendix Table S1. Clinical characteristics of subjects in the cohort.**

Patient from the non-IBD cohort were included following negative result after screening for possible IBD. Disease status was assessed according to endoscopic activity. Endoscopic remission for CD corresponds to an SES-CD score below 4. Endoscopic remission for UC corresponds to a Mayo score of 0 or 1. SD = standard deviation.

|                  | [IgA1]  |                       |                       | [IgA2]    |                        |                        | [Total IgA]             |                        |                         |
|------------------|---------|-----------------------|-----------------------|-----------|------------------------|------------------------|-------------------------|------------------------|-------------------------|
|                  | Non-IBD | CD                    | UC                    | Non-IBD   | CD                     | UC                     | Non-IBD                 | CD                     | UC                      |
| Age              | p=0.475 | r = 0.006<br>p=0.081  | p=0.562               | p = 0.778 | p = 0.386              | p = 0.940              | p = 0.475               | p = 0.352              | p = 0.823               |
| Disease duration | n/a     | p=0.739               | r = 0,598<br>p=0.073  | n/a       | p = 0.739              | p = 0.551              | n/a                     | p = 0.372              | p = 0.192               |
| [IgM]            | p=0.103 | r = -0.211<br>p=0.010 | p=0.116               | p = 0.175 | r = 0,426<br>p = 0.089 | r = 0,<br>p = 0.014    | r = -0.714<br>p = 0.033 | r = 0.818<br>p = 0.003 | r = 0.718<br>p = 0.016  |
| [IgG]            | p=0.333 | p=0.253               | p=0.053               | p = 0.417 | p = 0.253              | p = 0.186              | r = -0.999<br>p = 0.083 | p = 0.389              | r = 0.916<br>p = 0.0002 |
| [SC]             | p=0.356 | r = -0.074<br>p=0.001 | r = 0.967<br>p=0.0002 | p = 0.497 | r = 0.723<br>p = 0.001 | r = 0.917<br>p = 0.001 | r = -0.371<br>p = 0.058 | r = 0.664<br>p = 0.031 | r = 0.767<br>p = 0.021  |
| % IgA1+          | p=0.658 | p=0.410               | p=0.635               | p=0.419   | p = 0.540              | p = 0.528              | p = 0.595               | p = 0.860              | p = 0.881               |
| % IgA2+          | p=0.175 | p=0.906               | p=0.104               | p=1.000   | p = 0.839              | p = 0.355              | p = 0.302               | p = 0.694              | p = 0.237               |
| % double +       | p=0.497 | p=0.362               | r = 0.713<br>p=0.005  | p=0.658   | p = 0.362              | p = 0.228              | p = 0.302               | p = 0.138              | p = 0.273               |

**Appendix Table S2.**

Correlation results for total total IgA, IgA1 and IgA2 concentration. Brackets indicate ‘concentration’. Age and disease duration are expressed in years. Percentages refer to percentage of bound bacteria by flow cytometry.

| Group                       | Spearman's $\rho$ | P-value      |
|-----------------------------|-------------------|--------------|
| CTR IgA1 – Dectin-1 binding | 0,698             | 0,506        |
| CD IgA1 – Dectin-1 binding  | <b>0,738</b>      | <b>0,046</b> |
| CTR IgA2 – Dectin-1 binding | 0,927             | 0,244        |
| CD IgA2 – Dectin-1 binding  | -0,485            | 0,180        |
| UC IgA2 – Dectin-1 binding  | 0,070             | 0,930        |

**Appendix Table S3. Correlation between percent IgA1 or IgA2 reverse transcytosis and Dectin-1 binding**

| IgA2 N-glycosylation sites | Position  | Peptide sequence       | [M+H] <sup>+</sup> (Da) |
|----------------------------|-----------|------------------------|-------------------------|
| N92                        | [89-102]  | HYTNSSQDVTVPCR         | 1663.7493               |
| N131                       | [119-140] | PALEDLLLGSEANLTCTLTGLR | 2357.2380               |
| N205                       | [200-208] | TPLTANITK              | 958.5567                |
| N327                       | [319-340] | MAGKPTHVNVSVVMAEVDGTCY | 2351.0828               |

**Appendix Table S4. Primary sequences of IgA1/IgA2 heavy chain peptides potentially N/O-glycosylated.**

[M+H]<sup>+</sup> Monoisotopic m/z are calculated with cysteine carbamidomethylation and free N/S/T amino acids.

| Glycan composition <sup>1</sup> |     |     |        | Glycan structure <sup>2</sup> | IgA1 – Site N144                           |                    |                       |                    | IgA1 - Site N340                           |                    |                       |                    |
|---------------------------------|-----|-----|--------|-------------------------------|--------------------------------------------|--------------------|-----------------------|--------------------|--------------------------------------------|--------------------|-----------------------|--------------------|
| HexNAc                          | Hex | Fuc | Neu5Ac |                               | [M+H] <sup>+</sup><br>m/z exp <sup>3</sup> | $\Delta m^4$ (ppm) | RT <sup>5</sup> (min) | Score <sup>6</sup> | [M+H] <sup>+</sup><br>m/z exp <sup>3</sup> | $\Delta m^4$ (ppm) | RT <sup>5</sup> (min) | Score <sup>6</sup> |
| 2                               | 3   | 0   | 0      | Man3                          | 3855.9242                                  | 2.26               | 74.49                 | 888                | 3239.4565                                  | -0.86              | 51.60                 | 560                |
| 2                               | 4   | 0   | 0      | Man4                          | 4017.9672                                  | -0.28              | 74.37                 | 249                | 3401.5104                                  | -0.52              | 51.43                 | 231                |
| 2                               | 5   | 0   | 0      | Man5                          | 4180.0299                                  | 2.11               | 74.14                 | 875                | 3563.5671                                  | 0.61               | 51.21                 | 562                |
| 2                               | 6   | 0   | 0      | Man6                          | 4342.0763                                  | 0.54               | 73.89                 | 859                | 3725.6070                                  | -2.88              | 51.04                 | 290                |
| 2                               | 7   | 0   | 0      | Man7                          | 4504.1310                                  | 0.94               | 73.85                 | 674                | 3887.6678                                  | -0.71              | 50.85                 | 325                |
| 2                               | 8   | 0   | 0      | Man8                          | 4666.1916                                  | 2.56               | 73.62                 | 911                | 4049.7290                                  | 1.37               | 50.73                 | 491                |
| 3                               | 3   | 0   | 0      | Man3B                         | 4059.0001                                  | 1.30               | 74.14                 | 935                | 3442.5425                                  | 1.10               | 51.40                 | 586                |
| 3                               | 4   | 0   | 0      | Man4B/Hybrid                  | 4221.0539                                  | 1.46               | 74.23                 | 879                | 3604.5882                                  | -0.90              | 51.21                 | 319                |
| 3                               | 5   | 0   | 0      | Man5B/Hybrid                  | 4383.1061                                  | 1.28               | 73.99                 | 910                | 3782.6449                                  | 1.50               | 51.21                 | 197                |
| 4                               | 3   | 0   | 0      | G0                            | 4262.0827                                  | 1.98               | 74.16                 | 769                | 3645.6174                                  | -0.17              | 51.22                 | 542                |
| 4                               | 3   | 1   | 0      | G0F                           |                                            |                    |                       |                    | 3791.6755                                  | -0.12              | 51.41                 | 583                |
| 5                               | 3   | 0   | 0      | G0B                           | 4465.1540                                  | 0.08               | 74.06                 | 781                | 3848.6953                                  | -0.55              | 51.44                 | 389                |
| 5                               | 3   | 1   | 0      | G0FB                          |                                            |                    |                       |                    | 3994.7582                                  | 0.71               | 51.50                 | 452                |
| 4                               | 4   | 0   | 0      | G1                            | 4424.1413                                  | 3.21               | 74.30                 | 639                |                                            |                    |                       |                    |
| 4                               | 4   | 0   | 1      | G1S1                          | 4715.2287                                  | 1.31               | 80.23                 | 397                | 4098.7658                                  | -0.12              | 60.75                 | 191                |
| 4                               | 4   | 1   | 0      | G1F                           |                                            |                    |                       |                    | 3969.7207                                  | -0.76              | 51.11                 | 230                |
| 5                               | 4   | 0   | 0      | G1B                           |                                            |                    |                       |                    | 4010.7502                                  | 0.52               | 51.08                 | 430                |
| 4                               | 5   | 0   | 0      | G2                            | 4586.1925                                  | 2.76               | 74.33                 | 537                |                                            |                    |                       |                    |

**Appendix Table S5. IgA1 heavy chain N-glycopeptides identified in CD samples.**

N-linked glycans are localized on the residues N144 and N340.<sup>1</sup> The glycan composition is provided by Byonic software.<sup>2</sup> Hypothetical glycan structures referenced using IgG glycans naming system.<sup>3</sup> N-glycans are located on the IgA1 tryptic peptides [127-153] (LSLHRPALEDLLLGSEANLTCTLTGLR) and [332-353] (LAGKPTHVNVSVVMAEVDGTCY) respectively for N144 and N340. Experimental [M+H]<sup>+</sup> ions are referenced in the Table; 2+, 3+ and 4+ precursor ions were observed in our spectra.<sup>4</sup> Dm is measurement error.<sup>5</sup> RT is retention time.<sup>6</sup> Score is given by Byonic software.

**A**

| Glycan composition <sup>1</sup> |     |     |        | Glycan structure <sup>2</sup> | CD IgA2 N131                               |                       |                          |                    | UC IgA2 N131                               |                       |                          |                    |
|---------------------------------|-----|-----|--------|-------------------------------|--------------------------------------------|-----------------------|--------------------------|--------------------|--------------------------------------------|-----------------------|--------------------------|--------------------|
| HexNAc                          | Hex | Fuc | Neu5Ac |                               | [M+H] <sup>+</sup><br>m/z exp <sup>3</sup> | $\Delta m^4$<br>(ppm) | RT <sup>5</sup><br>(min) | Score <sup>6</sup> | [M+H] <sup>+</sup><br>m/z exp <sup>3</sup> | $\Delta m^4$<br>(ppm) | RT <sup>5</sup><br>(min) | Score <sup>6</sup> |
| 2                               | 3   | 0   | 0      | Man3                          | 3249.5617                                  | 1.98                  | 72.82                    | 470                |                                            |                       |                          |                    |
| 2                               | 5   | 0   | 0      | Man5                          | 3573.6628                                  | 0.52                  | 72.13                    | 535                | 3573.6606                                  | -0.09                 | 87.35                    | 298                |
| 2                               | 6   | 0   | 0      | Man6                          | 3735.7108                                  | -0.80                 | 71.93                    | 362                | 3735.7258                                  | 3.22                  | 86.97                    | 200                |
| 2                               | 8   | 0   | 0      | Man8                          |                                            |                       |                          |                    | 4059.8188                                  | -0.15                 | 86.46                    | 281                |
| 2                               | 9   | 0   | 0      | Man9                          |                                            |                       |                          |                    | 4221.8727                                  | 0.11                  | 86.37                    | 301                |
| 4                               | 3   | 0   | 0      | G0                            | 3655.7241                                  | 2.75                  | 72.33                    | 267                | 3655.7157                                  | 0.44                  | 87.44                    | 281                |
| 5                               | 3   | 0   | 0      | G0B                           | 3858.8034                                  | 2.60                  | 72.23                    | 333                | 3858.7961                                  | 0.70                  | 87.42                    | 665                |

**B**

| Glycan composition <sup>1</sup> |     |     |        | Glycan structure <sup>2</sup> | CD IgA2 N205                               |                    |                          |                    | UC IgA2 N205                               |                       |                          |                    |
|---------------------------------|-----|-----|--------|-------------------------------|--------------------------------------------|--------------------|--------------------------|--------------------|--------------------------------------------|-----------------------|--------------------------|--------------------|
| HexNAc                          | Hex | Fuc | Neu5Ac |                               | [M+H] <sup>+</sup><br>m/z exp <sup>3</sup> | $\Delta m^4$ (ppm) | RT <sup>5</sup><br>(min) | Score <sup>6</sup> | [M+H] <sup>+</sup><br>m/z exp <sup>3</sup> | $\Delta m^4$<br>(ppm) | RT <sup>5</sup><br>(min) | Score <sup>6</sup> |
| 2                               | 3   | 0   | 0      | Man3                          | 1850.8781                                  | 2.22               | 31.20                    | 682                |                                            |                       |                          |                    |
| 4                               | 3   | 0   | 0      | G0                            | 2257.0333                                  | 0.23               | 25.12                    | 351                |                                            |                       |                          |                    |
| 4                               | 3   | 1   | 0      | G0F                           | 2403.0919                                  | 0.52               | 24.24                    | 464                | 2403.0965                                  | 2.43                  | 30.70                    | 277                |
| 5                               | 3   | 0   | 0      | G0B                           | 2460.1102                                  | -0.77              | 25.32                    | 62                 | 2460.1133                                  | 0.49                  | 30.90                    | 290                |
| 5                               | 3   | 1   | 0      | G0FB                          | 2606.1714                                  | 0.54               | 25.31                    | 374                | 2606.1703                                  | 0.12                  | 30.98                    | 10                 |
| 4                               | 4   | 1   | 0      | G1F                           | 2565.1498                                  | 2.45               | 25.57                    | 337                |                                            |                       |                          |                    |
| 5                               | 4   | 1   | 0      | G1FB                          | 2768.2221                                  | -0.25              | 24.83                    | 138                | 2768.2238                                  | 0.34                  | 30.39                    | 120                |
| 5                               | 4   | 1   | 1      | G1S1FB                        |                                            |                    |                          |                    | 3059.3197                                  | 0.48                  | 36.89                    | 134                |
| 5                               | 5   | 1   | 0      | G2FB                          | 2930.2751                                  | -0.21              | 25.18                    | 20                 |                                            |                       |                          |                    |

# **Appendix Table S6 - IgA2 heavy chain N-glycopeptides identified in CD and UC samples.**

(A) N-linked glycans localized on the N131 residues. (B) N-linked glycans localized on the N205 residues. <sup>1</sup>The glycan composition is provided by Byonic software. <sup>2</sup> Hypothetical glycan structures referenced using IgG glycans naming system. <sup>3</sup> N-glycans are located on the IgA2 tryptic peptides [119-140] (PALEDLLLGSEANLTCTLTGLR) for Table A and [200-208] (TPLTANITK) for Table B. Experimental [M+H]<sup>+</sup> ions are referenced in the Table; 2+, 3+ and 4+ precursor ions were observed in our spectra. <sup>4</sup> Dm is measurement error. <sup>5</sup> RT is retention time. MS acquisitions started before/after nanoLC preconcentration step respectively for UC/CD. <sup>6</sup> Score is given by Byonic software.

| Glycan composition <sup>1</sup> |     |        | CD O-glycoforms                            |                    |                       |                    | UC O-glycoforms                            |                    |                       |                    |
|---------------------------------|-----|--------|--------------------------------------------|--------------------|-----------------------|--------------------|--------------------------------------------|--------------------|-----------------------|--------------------|
| GalNAc                          | Gal | Neu5Ac | [M+H] <sup>+</sup><br>m/z exp <sup>2</sup> | $\Delta m^3$ (ppm) | RT <sup>4</sup> (min) | Score <sup>5</sup> | [M+H] <sup>+</sup><br>m/z exp <sup>2</sup> | $\Delta m^3$ (ppm) | RT <sup>4</sup> (min) | Score <sup>5</sup> |
| 1                               | 0   | 0      | 4339.9767                                  | 1.71               | 41.78                 | 1386               | 4339.9718                                  | 0.59               | 46.16                 | 1065               |
| 1                               | 1   | 0      | 4502.0226                                  | 0.11               | 41.32                 | 1218               | 4502.0285                                  | 1.41               | 45.61                 | 563                |
| 1                               | 1   | 1      | 4793.1154                                  | -0.45              | 44.70                 | 1176               | #                                          | #                  | #                     | #                  |
| 2                               | 0   | 0      | 4543.0475                                  | -0.25              | 40.89                 | 1109               | 4543.0412                                  | -1.65              | 45.61                 | 320                |
| 2                               | 1   | 0      | 4705.1017                                  | 0.05               | 40.53                 | 1184               | #                                          | #                  | #                     | #                  |
| 2                               | 1   | 1      | 4996.1984                                  | 0.30               | 43.81                 | 1162               | 4996.1901                                  | -1.36              | 48.40                 | 101                |
| 2                               | 2   | 0      | 4867.1476                                  | -1.38              | 40.29                 | 946                | #                                          | #                  | #                     | #                  |
| 2                               | 2   | 1      | 5158.2531                                  | 0.65               | 43.28                 | 1067               | #                                          | #                  | #                     | #                  |
| 2                               | 2   | 2      | 5449.3546                                  | 1.74               | 46.49                 | 540                | #                                          | #                  | #                     | #                  |
| 3                               | 0   | 0      | 4746.1265                                  | -0.31              | 41.97                 | 1175               | #                                          | #                  | #                     | #                  |
| 3                               | 1   | 0      | 4908.1823                                  | 0.29               | 41.14                 | 1216               | #                                          | #                  | #                     | #                  |
| 3                               | 2   | 0      | 5070.2389                                  | 1.03               | 40.71                 | 1138               | 5070.2316                                  | -0.41              | 43.63                 | 134                |
| 3                               | 2   | 1      | 5361.3225                                  | -1.24              | 42.66                 | 177                | 5361.3332                                  | 0.76               | 46.95                 | 156                |
| 3                               | 3   | 0      | 5232.2858                                  | -0.14              | 39.69                 | 941                | 5232.2824                                  | -0.79              | 42.90                 | 273                |
| 3                               | 3   | 1      | 5523.3708                                  | -2.01              | 42.55                 | 876                | 5523.3825                                  | 0.10               | 46.04                 | 197                |
| 3                               | 3   | 2      |                                            |                    |                       |                    | 5814.4586                                  | -3.21              | 49.79                 | 135                |
| 3                               | 3   | 3      |                                            |                    |                       |                    | 6105.5778                                  | 0.83               | 53.91                 | 37                 |
| 4                               | 0   | 0      | 4949.2023                                  | -1.03              | 40.07                 | 986                | #                                          | #                  | #                     | #                  |
| 4                               | 1   | 0      | 5111.2746                                  | 2.80               | 40.45                 | 1162               | #                                          | #                  | #                     | #                  |
| 4                               | 1   | 1      | 5402.3532                                  | -0.46              | 42.99                 | 720                | #                                          | #                  | #                     | #                  |
| 4                               | 2   | 0      | 5273.3140                                  | 0.19               | 39.50                 | 1154               | 5273.3200                                  | 1.31               | 43.72                 | 278                |
| 4                               | 2   | 1      | 5564.4005                                  | -1.43              | 42.38                 | 902                | 5564.4020                                  | -1.16              | 46.89                 | 165                |
| 4                               | 3   | 0      | 5435.3629                                  | -0.54              | 39.15                 | 617                | 5435.3625                                  | -0.63              | 43.23                 | 437                |
| 4                               | 3   | 1      | 5726.4567                                  | -0.80              | 41.83                 | 808                | 5726.4611                                  | -0.04              | 45.95                 | 402                |
| 4                               | 3   | 2      | 6017.5651                                  | 1.40               | 44.56                 | 848                | 6017.5587                                  | 0.34               | 49.31                 | 325                |
| 4                               | 3   | 3      |                                            |                    |                       |                    | 6308.6569                                  | 0.75               | 53.12                 | 96                 |
| 4                               | 4   | 0      | 5597.4167                                  | -0.37              | 38.34                 | 808                | 5597.4210                                  | 0.42               | 42.31                 | 638                |
| 4                               | 4   | 1      | 5888.5236                                  | 1.61               | 41.18                 | 857                | 5888.5063                                  | -1.33              | 45.16                 | 640                |
| 4                               | 4   | 2      | 6179.6116                                  | 0.34               | 48.82                 | 460                | 6179.6165                                  | 1.13               | 48.38                 | 557                |
| 4                               | 4   | 3      |                                            |                    |                       |                    | 6470.7060                                  | 0.16               | 52.60                 | 492                |
| 5                               | 1   | 0      | 5314.3361                                  | -0.66              | 39.57                 | 927                |                                            |                    |                       |                    |
| 5                               | 2   | 0      | 5476.3898                                  | -0.48              | 38.80                 | 629                | 5476.4030                                  | 1.93               | 42.91                 | 91                 |
| 5                               | 2   | 1      | 5767.4907                                  | 0.49               | 41.61                 | 949                |                                            |                    |                       |                    |
| 5                               | 3   | 0      | 5638.4593                                  | 2.49               | 38.06                 | 915                | 5638.4442                                  | -0.19              | 42.06                 | 197                |
| 5                               | 3   | 1      | 5929.5377                                  | -0.49              | 40.75                 | 656                | 5929.5299                                  | -1.81              | 45.13                 | 225                |
| 5                               | 3   | 2      | 6220.6334                                  | -0.44              | 43.56                 | 724                | 6220.6425                                  | 1.04               | 48.42                 | 522                |
| 5                               | 3   | 3      |                                            |                    |                       |                    | 6511.7381                                  | 1.02               | 52.43                 | 89                 |
| 5                               | 4   | 0      | 5800.5137                                  | 2.70               | 37.51                 | 784                | 5800.5070                                  | 1.54               | 41.36                 | 342                |
| 5                               | 4   | 1      | 6091.5837                                  | -1.61              | 40.04                 | 839                | 6091.6032                                  | 1.60               | 43.97                 | 310                |
| 5                               | 4   | 2      | 6382.6835                                  | -0.84              | 43.05                 | 705                | 6382.7006                                  | 1.84               | 47.25                 | 442                |
| 5                               | 4   | 3      | 6673.7879                                  | 0.54               | 46.10                 | 251                | 6673.7877                                  | 0.50               | 51.13                 | 347                |
| 5                               | 5   | 0      | 5962.5548                                  | 0.65               | 41.02                 | 568                | 5962.5499                                  | -0.17              | 41.05                 | 256                |
| 5                               | 5   | 1      | 6253.6473                                  | 0.16               | 43.92                 | 497                | 6253.6455                                  | -0.14              | 43.79                 | 283                |
| 5                               | 5   | 2      |                                            |                    |                       |                    | 6544.7423                                  | 0.08               | 47.19                 | 353                |
| 5                               | 5   | 3      |                                            |                    |                       |                    | 6835.8398                                  | 0.50               | 51.21                 | 303                |
| 6                               | 2   | 0      | 5679.4601                                  | -2.06              | 38.51                 | 660                |                                            |                    |                       |                    |
| 6                               | 3   | 0      | 5841.5197                                  | -0.85              | 37.78                 | 301                | 5841.5138                                  | -1.85              | 41.68                 | 156                |
| 6                               | 3   | 1      | 6132.6032                                  | -2.75              | 40.14                 | 21                 | 6132.6090                                  | -1.79              | 44.33                 | 27                 |
| 6                               | 3   | 2      |                                            |                    |                       |                    | 6423.7150                                  | -0.07              | 47.90                 | 48                 |
| 6                               | 3   | 3      |                                            |                    |                       |                    | 6714.7996                                  | -1.67              | 51.35                 | 167                |
| 6                               | 4   | 0      | 6003.5851                                  | 1.28               | 36.71                 | 349                | 6003.5822                                  | 0.79               | 40.92                 | 34                 |
| 6                               | 4   | 1      |                                            |                    |                       |                    | 6294.6562                                  | -2.65              | 43.98                 | 246                |
| 6                               | 4   | 2      |                                            |                    |                       |                    | 6585.7829                                  | 2.22               | 46.85                 | 301                |
| 6                               | 4   | 3      |                                            |                    |                       |                    | 6876.8606                                  | 2.41               | 51.51                 | 259                |
| 6                               | 5   | 2      |                                            |                    |                       |                    | 6747.8392                                  | 2.68               | 46.63                 | 131                |
| 6                               | 5   | 3      |                                            |                    |                       |                    | 7038.9058                                  | 2.79               | 51.72                 | 129                |

**Appendix Table S7. IgA1 heavy chain O-glycoforms identified in CD and UC samples.**

<sup>1</sup>The glycan composition is provided by Byonic. <sup>2</sup> N-glycans are located on the IgA1 peptide [89-126] HYTNPSQDVTVPVPSTPPTPSPSTPPTPSPSCCHPR. Experimental [M+H]<sup>+</sup> ions are referenced in the Table; mainly 3+ and 4+ precursor ions were observed in our spectra. <sup>3</sup>  $\Delta m$  is measurement error. <sup>4</sup> RT is retention time. MS acquisitions started before/after nanoLC preconcentration step respectively for UC/CD. <sup>5</sup> Score is given by Byonic software. # m/z range showing contamination by other multiply charges species covering the glycoforms signals.

| Ig             | Motif                                                                 | LogFC        | p-value      |
|----------------|-----------------------------------------------------------------------|--------------|--------------|
| <b>All IgA</b> | Neu5Ac-2,3-Gal-1,4-Glc-Sp1                                            | <b>-1,80</b> | <b>0.019</b> |
|                | SGP                                                                   | <b>2,12</b>  | <b>0.049</b> |
|                | Neu5Ac-2,3-Gal-1,4-(Fuc-1,3)-Glc-[3-Sialyl-3-fucosyllactose/F-SL]-Sp1 | 2,45         | 0.050        |
|                | Sisomicin Sulfate                                                     | 1,22         | 0.096        |
| <b>IgA1</b>    | Gal-1,4-Gal-1,4-Glc-Sp                                                | -2,92        | 0.080        |
|                | 4-P-GlcNac-1,4-Man-Sp                                                 | -3,57        | 0.085        |
|                | Gal-1,3-(Neu5Ac-2,6)-GalNac-Sp                                        | 2,01         | 0.086        |
| <b>IgA2</b>    | Neu5Ac-2,3-Gal-1,4-(Fuc-1,3)-Glc-[3-Sialyl-3-fucosyllactose/F-SL]-Sp1 | <b>2,68</b>  | <b>0.037</b> |
|                | Maltotetraose-Sp1                                                     | <b>2,74</b>  | <b>0.044</b> |
|                | Neu5Ac-2,3-Gal-1,4-Glc-Sp1                                            | <b>-1,71</b> | <b>0.045</b> |
|                | Gal-1,3-GalNac-1,4-(Neu5Ac-2,3)-Gal-1,4-Glc-Sp1                       | 2,96         | 0.064        |
|                | GalNac-1,3-Gal-1,4-Gal-1,4-Glc-Sp                                     | 2,06         | 0.068        |

**Appendix Table S8. Glycan motifs recognition by CD IgAs**

| ID                                                                           | logFC     | AveExpr   | t         | P.Value   | adj.P.Val |
|------------------------------------------------------------------------------|-----------|-----------|-----------|-----------|-----------|
| Fuc- -1,2-Gal- -1,4-Glc- -[Blood H antigen trisaccharide]-Sp1                | -6.590417 | 4.744172  | -4.949344 | 0.0002511 | 0.0249564 |
| Gal- -1,3-GalNAc- -Sp1                                                       | -6.681671 | 3.355220  | -4.571872 | 0.0004991 | 0.0249564 |
| Neu5Gc- -2,3-Gal- -1,3-(Fuc- -1,4)-GlcNAc- -[Sialyl Lewis A]-Sp              | -6.567199 | 4.202897  | -4.178340 | 0.0010400 | 0.0334627 |
| GalNAc- -1,4-GlcNAc- -Sp2                                                    | -7.467455 | 6.047595  | -4.045053 | 0.0013385 | 0.0334627 |
| Gal- -1,3-(Fuc- -1,4)-GlcNAc- -1,3-Gal- -1,4-(Fuc- -1,4)-Glc- -[Lewis A]-Sp1 | -6.552701 | 3.830655  | -3.755552 | 0.0023276 | 0.0465520 |
| Maltohexaose- -Sp1                                                           | -7.377784 | 5.335618  | -3.494442 | 0.0038523 | 0.0496073 |
| Maltoheptaose- -Sp1                                                          | -7.061841 | 7.419834  | -3.478684 | 0.0039716 | 0.0496073 |
| (Fuc- -1,2)-Gal- -1,4-(Fuc- -1,3)-GlcNAc- -[Lewis Y]-Sp1                     | -6.175025 | 2.763122  | -3.408702 | 0.0045484 | 0.0496073 |
| Neu5Ac- -2,8-Neu5Ac- -2,8-Neu5Ac- -2,3-Gal- -1,4-Glc- -Sp3                   | -6.548126 | 4.466696  | -3.387310 | 0.0047410 | 0.0496073 |
| Fuc- -1,2-Gal- -1,3-GlcNAc- -1,3-Gal- -1,4-Glc- -[LNFP I]-Sp1                | -6.452538 | 3.393452  | -3.363955 | 0.0049607 | 0.0496073 |
| GlcNAc- -1,6-(Gal- -1,3)-GalNAc- -OSer-Sp4                                   | -6.935546 | 5.091995  | -3.227770 | 0.0064617 | 0.0565658 |
| GalNAc- -1,3-(Fuc- -1,2)-Gal- -1,4-Glc- -[Blood A antigen tetrose]-Sp1       | -7.697148 | 4.492655  | -3.202404 | 0.0067879 | 0.0565658 |
| Neu5Ac- -2,3-Gal- -1,4-Glc- -Sp                                              | -4.779441 | 6.314388  | -2.907011 | 0.0120374 | 0.0925955 |
| -1,4-Xylotetrose-Sp1                                                         | -5.341835 | 5.604743  | -2.770825 | 0.0156575 | 0.1014439 |
| KDN- -2,8-Neu5Ac- -2,3-Gal- -1,4-Glc- -Sp                                    | -5.709778 | 2.882824  | -2.748008 | 0.0163606 | 0.1014439 |
| Gal- -1,3-GalNAc- -Sp                                                        | -5.216042 | 6.845270  | -2.721336 | 0.0172218 | 0.1014439 |
| Maltotetraose- -Sp1                                                          | -6.441777 | 3.893764  | -2.672397 | 0.0189184 | 0.1014439 |
| Gal- -1,4-Gal- -1,4-GlcNAc- -Sp1                                             | -6.479006 | 5.655039  | -2.666874 | 0.0191198 | 0.1014439 |
| Neu5Ac- -2,3-Gal- -1,4-(Fuc- -1,3)-GlcNAc- -[Sialyl Lewis X]-Sp              | -5.118366 | 4.747289  | -2.654310 | 0.0195857 | 0.1014439 |
| Glc- -1,2-Gal- -1,3-Glc- -Sp                                                 | -6.556003 | 4.283860  | -2.635895 | 0.0202888 | 0.1014439 |
| Acarbose- -Sp1                                                               | -5.097598 | 4.739067  | -2.582288 | 0.0224775 | 0.1070359 |
| Neu5Ac- -2,6-Gal- -1,3-GlcNAc- -Sp                                           | -4.559677 | 5.611334  | -2.547821 | 0.0240039 | 0.1091084 |
| Tobramycin                                                                   | -3.245836 | 7.071676  | -2.492330 | 0.0266736 | 0.1113384 |
| GlcNAc- -1,2-Man- -Sp                                                        | -6.276621 | 3.361695  | -2.475860 | 0.0275196 | 0.1113384 |
| (Fuc- -1,2)-Gal- -1,3-(Fuc- -1,4)-GlcNAc- -[Lewis B]-Sp1                     | -4.699540 | 5.078640  | -2.469850 | 0.0278346 | 0.1113384 |
| Neu5Ac- -2,6-Gal- -1,3-GalNAc- -Sp                                           | -5.780578 | 3.955847  | -2.419030 | 0.0306407 | 0.1140370 |
| Maltotriose- -Sp1                                                            | -5.818373 | 5.082151  | -2.416453 | 0.0307900 | 0.1140370 |
| Gal- -1,4-(6S)GlcNAc- -Sp                                                    | -4.571710 | 5.413838  | -2.371448 | 0.0335119 | 0.1179979 |
| Gal- -1,4-Gal- -1,4-Glc- -Sp                                                 | -5.064456 | 5.439550  | -2.360321 | 0.0342194 | 0.1179979 |
| GlcA- -1,4-GlcNAc- -1,4-GlcA- -Sp                                            | -5.819592 | 5.396282  | -2.301035 | 0.0382351 | 0.1196513 |
| Neu5Ac- -2,3-Gal- -1,3-(Fuc- -1,4)-GlcNAc- -[Sialyl Lewis A]-Sp              | -4.010125 | 6.211924  | -2.301022 | 0.0382360 | 0.1196513 |
| Neu5Ac- -2,8-Neu5Ac- -2,3-Gal- -1,4-Glc- -Sp                                 | -4.406680 | 4.975613  | -2.300288 | 0.0382884 | 0.1196513 |
| Gal- -1,4-GlcNAc- -1,3-Gal- -1,4-Glc- -[LNnT]-Sp                             | -4.669214 | 5.184491  | -2.193256 | 0.0467021 | 0.1415214 |
| Gal- -1,3-(Fuc- -1,2)-Gal- -1,4-Glc- -[Blood B antigen tetrasaccharide]-Sp1  | -4.634118 | 3.734973  | -2.152613 | 0.0503300 | 0.1480293 |
| GalNAc- -1,3-(Fuc- -1,2)-Gal- -[Blood A antigen trisaccharide]-Sp1           | -4.786949 | 3.108536  | -2.054911 | 0.0601539 | 0.1718683 |
| GlcNAc- -1,4-GlcA- -1,4-GlcNAc- -1,4-GlcA- -Sp                               | -3.964664 | 6.740448  | -1.995736 | 0.0669376 | 0.1838174 |
| Neu5Ac- -2,3Gal- -1,4-(6S)GlcNAc- -Sp                                        | -4.433621 | 4.947328  | -1.981944 | 0.0686166 | 0.1838174 |
| Neu5Gc- -2,3-Gal- -1,4-Glc- -Sp                                              | -3.900122 | 5.942836  | -1.972003 | 0.0698506 | 0.1838174 |
| GalNAc- -1,4-(Neu5Ac- -2,3)-Gal- -1,4-Glc- -[GM2]-Sp                         | -3.567133 | 6.498104  | -1.893280 | 0.0803616 | 0.2060553 |
| GlcNAc- -1,3-(Glc- -1,2-Glc- -1,2)-Gal- -1,3-Glc- -Sp                        | -5.720180 | 10.592203 | -1.869301 | 0.0838373 | 0.2095933 |
| Neu5Ac- -2,6-Gal- -1,3-(Neu5Ac- -2,6)-GalNAc- -Sp                            | -3.390867 | 7.414372  | -1.837297 | 0.0886875 | 0.2163110 |
| -Man-Sp                                                                      | -3.365275 | 7.772559  | -1.794510 | 0.0955652 | 0.2233625 |
| Neu5Gc- -2,3-Gal- -1,3-GlcNAc- -Sp                                           | -3.987989 | 4.953645  | -1.791624 | 0.0960459 | 0.2233625 |
| Gal- -1,3-GalNAc- -1,4-(Neu5Gc- -2,3)-Gal- -1,4-Glc- -Sp1                    | -3.683544 | 4.782399  | -1.772913 | 0.0992146 | 0.2238621 |

**Appendix Table S9. Glycan motif recognition by UC IgA1.**

| ID                                                                 | logFC      | AveExpr  | t         | P.Value   | adj.P.Val |
|--------------------------------------------------------------------|------------|----------|-----------|-----------|-----------|
| Maltoheptaose--Sp1                                                 | -10.177366 | 9.623456 | -4.822570 | 0.0002347 | 0.0185735 |
| Neu5Ac--2,6-Gal--1,4-Glc--Sp                                       | -5.004681  | 4.953134 | -4.533753 | 0.0004127 | 0.0185735 |
| KDN--2,8-Neu5Ac--2,3-Gal--1,4-Glc--Sp                              | -6.544193  | 4.365996 | -4.305224 | 0.0006490 | 0.0185735 |
| -Glc--Sp                                                           | -7.045675  | 8.327813 | -4.237485 | 0.0007429 | 0.0185735 |
| GlcNAc--1,6-(Gal--1,3)-GalNAc--OSer--Sp4                           | -5.984347  | 6.130118 | -3.891166 | 0.0014907 | 0.0280501 |
| Neu5Ac--2,3-Gal--1,4-(Fuc--1,3)-GlcNAc--[Sialyl Lewis X]-Sp        | -4.362897  | 4.964691 | -3.831200 | 0.0016830 | 0.0280501 |
| GalNAc--1,4-GlcNAc--Sp2                                            | -6.211433  | 9.111515 | -3.682706 | 0.0022747 | 0.0324951 |
| Fuc--1,2-Gal--1,4-GlcNAc--[Blood H antigen trisaccharide]-Sp1      | -5.359058  | 5.406370 | -3.512394 | 0.0032163 | 0.0343368 |
| GalNAc--1,3-(Fuc--1,2)-Gal--1,4-Glc--[Blood A antigen tetrose]-Sp1 | -8.904305  | 6.902106 | -3.409500 | 0.0039659 | 0.0343368 |
| Gal--1,4-Gal--1,4-Glc--Sp                                          | -4.605782  | 5.176067 | -3.405713 | 0.0039966 | 0.0343368 |
| Neu5Gc--2,3-Gal--1,3-GlcNAc--Sp                                    | -4.255889  | 5.410857 | -3.386049 | 0.0041598 | 0.0343368 |
| GlcNAc--1,4-GlcNAc--Sp1                                            | -7.342213  | 4.266910 | -3.380756 | 0.0042049 | 0.0343368 |
| Glc--1,2-Gal--1,3-Glc--Sp                                          | -5.520974  | 4.826140 | -3.333903 | 0.0046258 | 0.0343368 |
| Gal--1,4-Gal--1,4-GlcNAc--Sp1                                      | -6.555633  | 6.403433 | -3.283301 | 0.0051276 | 0.0343368 |
| Gal--1,4-(Fuc--1,3)-GlcNAc--1,3-Gal--Sp1                           | -4.027449  | 3.699707 | -3.281106 | 0.0051505 | 0.0343368 |
| Gal--1,4-Gal--1,3-GlcNAc--Sp                                       | -4.092856  | 8.086921 | -3.184532 | 0.0062682 | 0.0391764 |
| -GalNAc--Sp                                                        | -4.441128  | 7.319521 | -2.872723 | 0.0117816 | 0.0693033 |
| Chitin-trisaccharide--Sp1                                          | -3.968479  | 5.821790 | -2.832935 | 0.0127628 | 0.0709044 |
| Maltohexaose--Sp1                                                  | -7.286832  | 6.954482 | -2.663873 | 0.0178951 | 0.0941846 |
| Neu5Ac--2,8-Neu5Ac--2,8-Neu5Ac--2,3-Gal--1,4-Glc--Sp3              | -4.289376  | 5.679682 | -2.590908 | 0.0206819 | 0.1012286 |
| Gal--1,3-Gal--1,4-Glc--Sp                                          | -3.402094  | 6.056665 | -2.574005 | 0.0213846 | 0.1012286 |
| GlcNAc--1,3-(Glc--1,2-Glc--1,2)-Gal--1,3-Glc--Sp                   | -5.978445  | 6.826053 | -2.553446 | 0.0222703 | 0.1012286 |
| Neu5Ac--2,3-Gal--1,4-Glc--Sp                                       | -2.617600  | 5.469975 | -2.529765 | 0.0233341 | 0.1014525 |
| Neu5Ac--2,6-Gal--1,3-(Neu5Ac--2,6)-GalNAc--Sp                      | -2.659482  | 8.521179 | -2.421496 | 0.0288470 | 0.1201958 |
| Neomycin trisulfate                                                | -2.334842  | 8.730945 | -2.345848 | 0.0334105 | 0.1287887 |
| -Fuc--Sp                                                           | -4.193148  | 6.204700 | -2.344695 | 0.0334851 | 0.1287887 |
| Kanamycin sulfate                                                  | -2.194632  | 8.217499 | -2.300333 | 0.0364761 | 0.1350967 |
| GalNAc--1,3-(Fuc--1,2)-Gal--[Blood A antigen trisaccharide]-Sp1    | -3.545229  | 3.367845 | -2.247054 | 0.0403999 | 0.1442854 |
| 4-P-GlcNAc--1,4-Man--Sp                                            | -3.869121  | 6.887956 | -2.219258 | 0.0426005 | 0.1468984 |
| GlcNAc--1,2-Man--Sp                                                | -3.714347  | 5.194681 | -2.173203 | 0.0464942 | 0.1549807 |
| Gal--1,3-Gal--1,3-GlcNAc--Sp                                       | -2.149561  | 7.971651 | -2.137848 | 0.0497047 | 0.1592826 |
| Gal--1,4-(6S)GlcNAc--Sp                                            | -3.731318  | 5.822946 | -2.117029 | 0.0516899 | 0.1592826 |
| GalNAc--1,4-(Neu5Ac--2,3)-Gal--1,4-Glc--[GM2]-Sp                   | -2.247424  | 6.458179 | -2.108104 | 0.0525632 | 0.1592826 |
| -GlcNAc--Sp                                                        | -3.022555  | 7.461608 | -2.091166 | 0.0542581 | 0.1595825 |
| GlcNAc--1,4-GlcA--1,4-GlcNAc--1,4-GlcA--Sp                         | -4.374304  | 5.347898 | -2.033823 | 0.0603758 | 0.1708416 |
| Neu5Gc--2,3-Gal--1,3-(Fuc--1,4)-GlcNAc--[Sialyl Lewis A]-Sp        | -3.246485  | 5.175709 | -2.023842 | 0.0615030 | 0.1708416 |
| Maltotetraose--Sp1                                                 | -3.178338  | 5.378883 | -1.930619 | 0.0729950 | 0.1972838 |
| Gal--1,3-GalNAc--1,4-(Neu5Gc--2,3)-Gal--1,4-Glc--Sp1               | -3.689783  | 5.236531 | -1.830513 | 0.0874624 | 0.2286985 |
| Neu5Ac--2,3Gal--1,4-(6S)GlcNAc--Sp                                 | -1.706805  | 6.931192 | -1.819553 | 0.0891924 | 0.2286985 |
| Glc--1,6-Glc--1,6-Glc--Sp1                                         | -3.052352  | 5.422809 | -1.774218 | 0.0966757 | 0.2416892 |

**Appendix Table S10. Glycan motif recognition by UC IgA2.**

| Ord      | Biomarker                                                        | Ord | Biomarker                                                                   | Ord | Biomarker                                                         | Ord | Biomarker                                                                    | Ord | Biomarker                                        |
|----------|------------------------------------------------------------------|-----|-----------------------------------------------------------------------------|-----|-------------------------------------------------------------------|-----|------------------------------------------------------------------------------|-----|--------------------------------------------------|
| Cluster1 |                                                                  |     |                                                                             |     |                                                                   |     |                                                                              |     |                                                  |
| 1        | Gal- -1,3-GalNAc- -1,4-(Neu5Ac- -2,3)-Gal- -1,4-Glc- -Sp1        | 4   | Gal- -1,3-(Neu5Ac- -2,6)-GalNAc- -Sp                                        | 7   | SGP                                                               | 10  | Neu5Ac- -2,6-(Neu5Ac- -2,3)-Gal- -1,3-GalNAc- -Sp                            | 13  | Gal- -1,4-(Fuc- -1,3)-Glc- -Sp                   |
| 2        | -Gal-Sp                                                          | 5   | Neu5Ac- -2,8-Neu5Ac- -2,6-Gal- -1,4-Glc-Sp5                                 | 8   | -Fuc-Sp                                                           | 11  | Gal- -1,3-Gal- -Sp1                                                          | 14  | Sisomicin Sulfate                                |
| 3        | GalNAc- -1,3-Gal- -1,4-Gal- -1,4-Glc- -Sp                        | 6   | Neu5Ac- -2,3-Gal- -1,4-(Fuc- -1,3)-Glc-[3-Sialyl-3-fucosyllactose/F-SL]-Sp1 | 9   | Neu5Ac- -2,6-Gal- -1,4-Glc- -Sp                                   | 12  | Neu5Ac- -2,3-Gal- -1,3-(Neu5Ac- -2,6)-GalNAc- -Sp                            |     |                                                  |
| Cluster2 |                                                                  |     |                                                                             |     |                                                                   |     |                                                                              |     |                                                  |
| 1        | Gal- -1,4-(Fuc- -1,3)-GlcNAc- -1,3-Gal- -Sp1                     | 6   | Neu5Ac- -2,6-Gal- -1,3-GalNAc- -Sp                                          | 11  | Kanamycin sulfate                                                 | 16  | D-pentamannuronic acid- -Sp1                                                 | 21  | Gal- -1,4-GlcNAc- -1,3-Gal- -1,4-Glc- -[LNnT]-Sp |
| 2        | Neu5Gc- -2,6-Gal- -1,3-GlcNAc- -Sp                               | 7   | GlcNAc- -1,2-Man- -Sp                                                       | 12  | Neomycin trisulfate                                               | 17  | Gentamicin Sulfate                                                           | 22  | GlcNAc- -1,6-(Gal- -1,3)-GalNAc- -OSer-Sp4       |
| 3        | Geneticin Disulfate Salt (G418)                                  | 8   | (Fuc- -1,2)-Gal- -1,4-(Fuc- -1,3)-GlcNAc- -[Lewis Y]-Sp1                    | 13  | Gal- -1,3-Gal- -1,3-GlcNAc- -Sp                                   | 18  | -Man-Sp                                                                      | 23  | Maltotriose- -Sp1                                |
| 4        | Gal- -1,4-GlcNAc- -Sp                                            | 9   | KDN- -2,8-Neu5Ac- -2,3-Gal- -1,4-Glc- -Sp                                   | 14  | GlcNAc- -1,4-GlcNAc- -Sp1                                         | 19  | Glc- -1,6-Glc- -1,4-Glc- -Sp1                                                |     |                                                  |
| 5        | Gal- -1,3-GalNAc- -1,3-Gal- -Sp1                                 | 10  | Gal- -1,3-GlcNAc- -Sp                                                       | 15  | GalNAc- -1,4-(Neu5Ac- -2,3)-Gal- -1,4-Glc- -[GM2]-Sp              | 20  | Glc- -1,6-Glc- -1,6-Glc- -Sp1                                                |     |                                                  |
| Cluster3 |                                                                  |     |                                                                             |     |                                                                   |     |                                                                              |     |                                                  |
| 1        | (Fuc- -1,2)-Gal- -1,3-(Fuc- -1,4)-GlcNAc- -[Lewis B]-Sp1         | 6   | -GlcNAc-Sp                                                                  | 11  | Gal- -1,3-GalNAc- -1,4-(Neu5Gc- -2,3)-Gal- -1,4-Glc- -Sp1         | 16  | Gal- -1,3-(Fuc- -1,4)-GlcNAc- -[Lewis A]-Sp                                  | 21  | Gal- -1,3-GalNAc- -Sp1                           |
| 2        | Acarbose- -Sp1                                                   | 7   | Gal- -1,4-Glc- -Sp                                                          | 12  | GalNAc- -1,4-(Neu5Ac- -2,8-Neu5Ac- -2,3)-Gal- -1,4-Glc- -[GD2]-Sp | 17  | Fuc- -1,2-Gal- -1,3-GlcNAc- -1,3-Gal- -1,4-Glc- -[LNFP I]-Sp1                |     |                                                  |
| 3        | Fuc- -1,2-Gal- -1,4-GlcNAc- -[Blood H antigen trisaccharide]-Sp1 | 8   | Neu5Ac- -2,3-Gal- -1,4-Glc- -Sp                                             | 13  | Gal- -1,4-(6S)GlcNAc- -Sp                                         | 18  | Gal- -1,3-(Fuc- -1,4)-GlcNAc- -1,3-Gal- -1,4-(Fuc- -1,4)-Glc- -[Lewis A]-Sp1 |     |                                                  |
| 4        | Neu5Ac- -2,3-Gal- -1,3-(Fuc- -1,4)-GlcNAc- -[Sialyl Lewis A]-Sp  | 9   | Neu5Gc- -2,8-Neu5Ac- -2,3-Gal- -1,4-Glc- -Sp                                | 14  | Neu5Ac- -2,8-Neu5Ac- -2,8-Neu5Ac- -2,3-Gal- -1,4-Glc- -Sp3        | 19  | Neu5Gc- -2,3-Gal- -1,3-(Fuc- -1,4)-GlcNAc- -[Sialyl Lewis A]-Sp              |     |                                                  |

| Ord      | Biomarker                                                                         | Ord | Biomarker                                                                                   | Ord | Biomarker                                                             | Ord | Biomarker                                                                                | Ord | Biomarker                                                                                         |
|----------|-----------------------------------------------------------------------------------|-----|---------------------------------------------------------------------------------------------|-----|-----------------------------------------------------------------------|-----|------------------------------------------------------------------------------------------|-----|---------------------------------------------------------------------------------------------------|
| 5        | Gal- -1,3-<br>(Fuc- -1,2)-<br>Gal- -[Blood<br>B antigen<br>trisaccharide]-<br>Sp1 | 10  | Neu5Ac- -<br>2,6-Gal- -<br>1,3-GlcNAc-<br>-Sp                                               | 15  | Neu5Gc- -<br>2,3-Gal- -<br>1,3-GlcNAc-<br>-Sp                         | 20  | Fuc- -1,2-<br>Gal- -1,4-<br>Glc- -[Blood<br>H antigen<br>trisaccharide]-<br>Sp1          |     |                                                                                                   |
| Cluster4 |                                                                                   |     |                                                                                             |     |                                                                       |     |                                                                                          |     |                                                                                                   |
| 1        | Chitin-<br>trisaccharide-<br>Sp1                                                  | 3   | Neu5Ac- -<br>2,8-Neu5Gc-<br>-2,3-Gal- -<br>1,4-Glc- -Sp                                     | 5   | Neu5Ac- -<br>2,3-Gal- -<br>1,3-GlcNAc-<br>-Sp                         | 7   | GalNAc- -<br>1,3-(Fuc- -<br>1,2)-Gal- -<br>[Blood A<br>antigen<br>trisaccharide]-<br>Sp1 | 9   | Neu5Ac- -<br>2,3-Gal- -<br>1,4-(Fuc- -<br>1,3)-<br>GlcNAc- -<br>[Sialyl Lewis<br>X]-Sp            |
| 2        | Gal- -1,4-<br>(Fuc- -1,3)-<br>GlcNAc- -<br>[LewisX]-Sp                            | 4   | GlcNAc- -<br>1,6-GlcNAc-<br>-Sp                                                             | 6   | Neu5Gc- -<br>2,3-Gal- -<br>1,4-Glc- -Sp                               | 8   | L-<br>pentaguronic<br>acid- -Sp1                                                         | 10  | Gal- -1,3-<br>(Fuc- -1,2)-<br>Gal- -1,4-<br>Glc- -[Blood<br>B antigen<br>tetrasaccharide]-<br>Sp1 |
| Cluster5 |                                                                                   |     |                                                                                             |     |                                                                       |     |                                                                                          |     |                                                                                                   |
| 1        | Neu5Ac- -<br>2,3Gal- -1,4-<br>(6S)GlcNAc-<br>-Sp                                  | 8   | -GalNAc-Sp                                                                                  | 15  | Neu5Ac- -<br>2,6-Gal- -<br>1,3-<br>(Neu5Ac- -<br>2,6)-<br>GalNAc- -Sp | 22  | -1,4-<br>Xylotetrose-<br>Sp1                                                             | 29  | -D-Rha-Sp                                                                                         |
| 2        | Neu5Ac- -<br>2,8-Neu5Ac-<br>-2,3-Gal<br>-1,4-Glc- -Sp                             | 9   | Glc- -1,4-<br>Glc- -Sp1                                                                     | 16  | Gal- -1,3-<br>GalNAc- -Sp                                             | 23  | Gal- -1,3-<br>Gal- -1,4-<br>Glc- -Sp                                                     | 30  | Glc- -1,2-<br>Gal- -1,3-<br>Glc- -Sp                                                              |
| 3        | GalNAc- -<br>1,3-Gal- -<br>1,4-Glc- -Sp                                           | 10  | Gal- -1,4-<br>Gal- -1,4-<br>Glc- -Sp                                                        | 17  | GlcNAc- -<br>1,4-GlcA- -<br>1,4-GlcNAc-<br>1,4-GlcA- -<br>Sp          | 24  | -Rha-Sp                                                                                  | 31  | Gal- -1,4-<br>Gal- -1,4-<br>GlcNAc- -<br>Sp1                                                      |
| 4        | GlcNAc- -<br>1,3-Gal- -<br>1,4-Glc- -Sp                                           | 11  | GlcA- -1,4-<br>GlcNAc- -<br>1,4-GlcA- -<br>Sp                                               | 18  | Tobramycin                                                            | 25  | Gal- -1,4-<br>Gal- -1,3-<br>GlcNAc- -Sp                                                  | 32  | Maltohexaose-<br>-Sp1                                                                             |
| 5        | Neu5Ac- -<br>2,6-Gal- -<br>1,4-Glc- -Sp                                           | 12  | 4-P-GlcNAc-<br>-1,4-Man- -<br>Sp                                                            | 19  | GlcNAc- -<br>1,3-(Glc- -<br>1,2-Glc- -<br>1,2)-Gal -<br>1,3-Glc- -Sp  | 26  | -Glc-Sp                                                                                  |     |                                                                                                   |
| 6        | Neu5Ac- -<br>2,3-Gal- -Sp1                                                        | 13  | GalNAc- -<br>1,3-(Fuc- -<br>1,2)-Gal- -<br>1,4-Glc -<br>[Blood A<br>antigen<br>tetrose]-Sp1 | 20  | GalNAc- -<br>1,4-GlcNAc-<br>-Sp2                                      | 27  | D-cellose- -<br>Sp1                                                                      |     |                                                                                                   |
| 7        | Glc- -1,2-<br>Gal- -Sp                                                            | 14  | Maltotetraose-<br>-Sp1                                                                      | 21  | Maltoheptaose-<br>-Sp1                                                | 28  | -D-GlcA-Sp                                                                               |     |                                                                                                   |

**Appendix Table S11. Glycan motifs in IgA1-targeted clusters**

| Ord      | Biomarker                                                       | Ord | Biomarker                                                 | Ord | Biomarker                                                       | Ord | Biomarker                                                                     | Ord | Biomarker                                                          |
|----------|-----------------------------------------------------------------|-----|-----------------------------------------------------------|-----|-----------------------------------------------------------------|-----|-------------------------------------------------------------------------------|-----|--------------------------------------------------------------------|
| Cluster1 |                                                                 |     |                                                           |     |                                                                 |     |                                                                               |     |                                                                    |
| 1        | Gal- -1,4-(Fuc- -1,3)-GlcNAc- -[LewisX]-Sp                      | 4   | Neu5Ac- -2,6-Gal- -1,4-Glc- -Sp                           | 7   | SGP                                                             | 10  | Gal- -1,3-(Neu5Ac- -2,6)-GalNAc- -Sp                                          |     |                                                                    |
| 2        | Neu5Ac- -2,3-Gal- -1,3-(Fuc- -1,4)-GlcNAc- -[Sialyl Lewis A]-Sp | 5   | Gal- -1,4-(Fuc- -1,3)-Glc- -Sp                            | 8   | Geneticin Disulfate Salt (G418)                                 | 11  | D-pentamannuronic acid- -Sp1                                                  |     |                                                                    |
| 3        | GalNAc- -1,3-Gal- -1,4-Gal- -1,4-Glc- -Sp                       | 6   | Neu5Ac- -2,3-Gal- -Sp1                                    | 9   | Acarbose- -Sp1                                                  |     |                                                                               |     |                                                                    |
| Cluster2 |                                                                 |     |                                                           |     |                                                                 |     |                                                                               |     |                                                                    |
| 1        | (Fuc- -1,2)-Gal- -1,4-(Fuc- -1,3)-GlcNAc- -[Lewis Y]-Sp1        | 4   | GlcNAc- -1,2-Man- -Sp                                     | 7   | KDN- -2,8-Neu5Ac- -2,3-Gal- -1,4-Glc- -Sp                       | 10  | (Fuc- -1,2)-Gal- -1,3-(Fuc- -1,4)-GlcNAc- -[Lewis B]-Sp1                      | 13  | Maltotetraose- -Sp1                                                |
| 2        | Gal- -1,3-GalNAc- -1,4-(Neu5Ac- -2,3)-Gal- -1,4-Glc- -Sp1       | 5   | Gal- -1,4-(6S)GlcNAc- -Sp                                 | 8   | Neu5Ac- -2,8-Neu5Ac- -2,3-Gal- -1,4-Glc- -Sp3                   | 11  | Gentamicin Sulfate                                                            | 14  | GalNAc- -1,3-(Fuc- -1,2)-Gal- -[Blood A antigen trisaccharide]-Sp1 |
| 3        | Neu5Gc- -2,3-Gal- -1,3-GlcNAc- -Sp                              | 6   | Gal- -1,3-GalNAc- -1,4-(Neu5Gc- -2,3)-Gal- -1,4-Glc- -Sp1 | 9   | Glc- -1,6-Glc- -1,6-Glc- -Sp1                                   | 12  | Neu5Ac- -2,3-Gal- -1,4-(Fuc- -1,3)-Glc- -[3-Sialyl-3-fucosyllactose/F-SL]-Sp1 | 15  | Maltotriose- -Sp1                                                  |
| Cluster3 |                                                                 |     |                                                           |     |                                                                 |     |                                                                               |     |                                                                    |
| 1        | Fuc- -1,2-Gal- -1,3-GlcNAc- -1,3-Gal- -1,4-Glc- -[LNFP I]-Sp1   | 3   | -Rha-Sp                                                   | 5   | Gal- -1,3-Gal- -1,4-Glc- -Sp                                    | 7   | Neu5Ac- -2,6-Gal- -1,3-(Neu5Ac- -2,6)-GalNAc- -Sp                             | 9   | Gal- -1,4-Glc- -Sp                                                 |
| 2        | Neu5Ac- -2,8-Neu5Ac- -2,6-Gal- -1,4-Glc-Sp5                     | 4   | D-cellose- -Sp1                                           | 6   | Neomycin trisulfate                                             | 8   | Kanamycin sulfate                                                             | 10  | Neu5Gc- -2,8-Neu5Ac- -2,3-Gal- -1,4-Glc- -Sp                       |
| Cluster4 |                                                                 |     |                                                           |     |                                                                 |     |                                                                               |     |                                                                    |
| 1        | -Fuc-Sp                                                         | 11  | Gal- -1,4-(Fuc- -1,3)-GlcNAc- -1,3-Gal- -Sp1              | 21  | Gal- -1,4-GlcNAc- -1,3-Gal- -1,4-Glc- -[LNnT]-Sp                | 31  | GlcA- -1,4-GlcNAc- -1,4-GlcA- -Sp                                             | 41  | GlcNAc- -1,4-GlcA- -1,4-GlcNAc- -1,4-GlcA- -Sp                     |
| 2        | Glc- -1,2-Gal- -1,3-Glc- -Sp                                    | 12  | Neu5Ac- -2,8-Neu5Ac- -2,3-Gal- -1,4-Glc- -Sp              | 22  | Neu5Ac- -2,3Gal- -1,4-(6S)GlcNAc- -Sp                           | 32  | Gal- -1,3-GlcNAc- -Sp                                                         | 42  | -Gal-Sp                                                            |
| 3        | Neu5Ac- -2,6-Gal- -1,4-Glc- -Sp                                 | 13  | Gal- -1,4-GlcNAc- -Sp                                     | 23  | Gal- -1,3-(Fuc- -1,2)-Gal- -[Blood B antigen trisaccharide]-Sp1 | 33  | Neu5Ac- -2,6-Gal- -1,3-GlcNAc- -Sp                                            | 43  | -Man-Sp                                                            |
| 4        | -Glc-Sp                                                         | 14  | -GlcNAc-Sp                                                | 24  | Gal- -1,3-GalNAc- -Sp                                           | 34  | Neu5Ac- -2,6-(Neu5Ac- -2,3)-Gal- -1,3-GalNAc- -Sp                             | 44  | GlcNAc- -1,6-GlcNAc- -Sp                                           |

| Ord      | Biomarker                                                                                          | Ord | Biomarker                                                                                         | Ord | Biomarker                                               | Ord | Biomarker                                                                                | Ord | Biomarker                                                                       |
|----------|----------------------------------------------------------------------------------------------------|-----|---------------------------------------------------------------------------------------------------|-----|---------------------------------------------------------|-----|------------------------------------------------------------------------------------------|-----|---------------------------------------------------------------------------------|
| 5        | Gal- -1,4-<br>Gal- -1,4-<br>Glc- -Sp                                                               | 15  | Neu5Ac- -<br>2,3-Gal- -<br>1,3-<br>(Neu5Ac- -<br>2,6)-<br>GalNAc- -Sp                             | 25  | Sisomicin<br>Sulfate                                    | 35  | Neu5Gc- -<br>2,3-Gal- -<br>1,4-Glc- -Sp                                                  | 45  | -GalNAc-Sp                                                                      |
| 6        | Fuc- -1,2-<br>Gal- -1,4-<br>GlcNAc- -<br>[Blood H<br>antigen<br>trisaccharide]-<br>Sp1             | 16  | GlcNAc- -<br>1,4-GlcNAc-<br>-Sp1                                                                  | 26  | Neu5Ac- -<br>2,8-Neu5Gc-<br>-2,3-Gal- -<br>1,4-Glc- -Sp | 36  | Gal- -1,3-<br>GalNAc- -<br>1,3-Gal- -Sp1                                                 | 46  | Fuc- -1,2-<br>Gal- -1,4-<br>Glc- -[Blood<br>H antigen<br>trisaccharide]-<br>Sp1 |
| 7        | Neu5Gc- -<br>2,3-Gal- -<br>1,3-(Fuc- -<br>1,4)-<br>GlcNAc- -<br>[Sialyl Lewis<br>A]-Sp             | 17  | Maltohexaose-<br>-Sp1                                                                             | 27  | Glc- -1,4-<br>Glc- -Sp1                                 | 37  | GlcNAc- -<br>1,3-(Glc- -<br>1,2-Glc- -<br>1,2)-Gal -<br>1,3-Glc- -Sp                     |     |                                                                                 |
| 8        | GlcNAc- -<br>1,6-(Gal- -<br>1,3)-<br>GalNAc- -<br>OSer-Sp4                                         | 18  | GalNAc- -<br>1,3-(Fuc- -<br>1,2)-Gal- -<br>1,4-Glc -<br>[Blood A<br>antigen<br>tetrose]-Sp1       | 28  | Glc- -1,6-<br>Glc- -1,4-<br>Glc- -Sp1                   | 38  | Maltoheptaose-<br>-Sp1                                                                   |     |                                                                                 |
| 9        | GalNAc- -<br>1,4-GlcNAc-<br>-Sp2                                                                   | 19  | Gal- -1,4-<br>Gal- -1,4-<br>GlcNAc- -<br>Sp1                                                      | 29  | GlcNAc- -<br>1,3-Gal- -<br>1,4-Glc- -Sp                 | 39  | 4-P-GlcNAc-<br>-1,4-Man- -<br>Sp                                                         |     |                                                                                 |
| 10       | Neu5Ac- -<br>2,3-Gal- -<br>1,4-(Fuc- -<br>1,3)-<br>GlcNAc- -<br>[Sialyl Lewis<br>X]-Sp             | 20  | Gal- -1,4-<br>Gal- -1,3-<br>GlcNAc- -Sp                                                           | 30  | GalNAc- -<br>1,3-Gal- -<br>1,4-Glc- -Sp                 | 40  | Chitin-<br>trisaccharide-<br>Sp1                                                         |     |                                                                                 |
| Cluster5 |                                                                                                    |     |                                                                                                   |     |                                                         |     |                                                                                          |     |                                                                                 |
| 1        | Gal- -1,3-<br>(Fuc- -1,4)-<br>GlcNAc- -<br>1,3-Gal -1,4-<br>(Fuc- -1,4)-<br>Glc- -[Lewis<br>A]-Sp1 | 5   | Gal- -1,3-<br>Gal- -Sp1                                                                           | 9   | Glc- -1,2-<br>Gal- -Sp                                  | 13  | GalNAc- -<br>1,4-<br>(Neu5Ac- -<br>2,3)-Gal- -<br>1,4-Glc- -<br>[GM2]-Sp                 | 17  | Gal- -1,3-<br>Gal- -1,3-<br>GlcNAc- -Sp                                         |
| 2        | -D-Rha-Sp                                                                                          | 6   | Gal- -1,3-<br>(Fuc- -1,2)-<br>Gal- -1,4-<br>Glc- -[Blood<br>B antigen<br>tetrasaccharide]-<br>Sp1 | 10  | Neu5Ac- -<br>2,6-Gal- -<br>1,3-GalNAc-<br>-Sp           | 14  | GalNAc- -<br>1,4-<br>(Neu5Ac- -<br>2,8-Neu5Ac-<br>-2,3)-Gal- -<br>1,4-Glc- -<br>[GD2]-Sp | 18  | Neu5Ac- -<br>2,3-Gal- -<br>1,4-Glc- -Sp                                         |
| 3        | -D-GlcA-Sp                                                                                         | 7   | -1,4-<br>Xylotetrose-<br>Sp1                                                                      | 11  | Neu5Gc- -<br>2,6-Gal- -<br>1,3-GlcNAc-<br>-Sp           | 15  | Tobramycin                                                                               |     |                                                                                 |
| 4        | L-<br>pentaguronic<br>acid- -Sp1                                                                   | 8   | Gal- -1,3-<br>GalNAc- -<br>Sp1                                                                    | 12  | Neu5Ac- -<br>2,3-Gal- -<br>1,3-GlcNAc-<br>-Sp           | 16  | Gal- -1,3-<br>(Fuc- -1,4)-<br>GlcNAc- -<br>[Lewis<br>A]-Sp                               |     |                                                                                 |

**Appendix Table S12. Glycan motifs in IgA2-targeted clusters**

| Genus, Species (Order, Cluster)                                                        | Abundance vs. control | p-value                |
|----------------------------------------------------------------------------------------|-----------------------|------------------------|
| <i>Bacteroides</i> , Unknown ( <i>Bacteroidales</i> , 33)                              | Increased             | 5.97.10 <sup>-15</sup> |
| <i>Bacteroides</i> , Unknown ( <i>Bacteroidales</i> , 56)                              | Increased             | 0,011                  |
| <i>Lachnoclostridium</i> , Unknown ( <i>Clostridiales</i> , 122)                       | Increased             | 0,019                  |
| Unknown <i>Lachnospiraceae</i> , Unknown ( <i>Clostridiales</i> , 136)                 | Increased             | 0,019                  |
| <i>Lachnoclostridium</i> , Unknown ( <i>Clostridiales</i> , 275)                       | Increased             | 0,042                  |
| <i>Anaerostipes</i> , Unknown ( <i>Clostridiales</i> , 34)                             | Increased             | 0,011                  |
| <i>Blautia</i> , Unknown ( <i>Clostridiales</i> , 239)                                 | Increased             | 0,042                  |
| <i>Lachnospira</i> , Unknown ( <i>Clostridiales</i> , 245)                             | Increased             | 0,027                  |
| <i>Bifidobacterium</i> , Unknown ( <i>Bifidobacteriales</i> , 25)                      | Increased             | 0,019                  |
| <i>Butyricicoccus</i> , Unknown ( <i>Clostridiales</i> , 68)                           | Increased             | 0,019                  |
| <i>Blautia</i> , Unknown ( <i>Clostridiales</i> , 102)                                 | Increased             | 0,019                  |
| <i>Faecalibacterium</i> , Unknown ( <i>Clostridiales</i> , 4)                          | Increased             | 0,019                  |
| <i>Streptococcus</i> , <i>Streptococcus salivarius</i> ( <i>Lactobacillales</i> , 275) | Increased             | 0,043                  |

**Appendix Table S13. Differentially recognised species in the IgA1<sup>+</sup> fraction of the CD stool microbiota**

| Name                                                                       | Sequence                |
|----------------------------------------------------------------------------|-------------------------|
| NonEUB 338 (Negative control)                                              | ACATCCTACGGGAGGC        |
| EUB338 (Positive control)                                                  | GCTGCCTCCCGTAGGAGT      |
| Ato291 ( <i>Collinsella aerofasciens</i> )                                 | GGTCGGTCTCTCAACCC       |
| Bac303 ( <i>Bacteroides</i> – <i>Prevotella</i> group)                     | CCAATGTGGGGGACCTT       |
| Bacto1080 ( <i>Bacteroides vulgatus</i> )                                  | GCACTTAAGCCGACACCT      |
| Bif164 ( <i>Bifidobacterium</i> genus)                                     | CATCCGGCATTACCACCC      |
| Bif228 ( <i>Bifidobacterium longum</i> )                                   | GATAGGACGCGACCCCAT      |
| Erec482 ( <i>Eubacterium rectale</i> - <i>Clostridium coccoides</i> group) | GCTTCTTAGTCARGGTACCG    |
| Fprau645 ( <i>Faecalibacterium prausnitzii</i> )                           | CCTCTGCACTACTCAAGAAAAAC |
| Lab158 ( <i>Lactobacillus</i> – <i>Enterococcus</i> group)                 | GGTATTAGCAYCTGTTTCCA    |

**Appendix Table S14. FISH probe sequences (Eurogentec)**
